# Supplementary material
Source: PubMed Central journal article supplement (PMC5716488)
Supplement: NIHMS897369-supplement-Supplemental.pdf [file NIHMS897369-supplement-Supplemental.pdf]

### **Cell culture**

Cell line HL60 (acute myelocytic leukemia) was a generous gift from David Scheinberg lab, Memorial Sloan Kettering Cancer Center. All cells were cultured in RPMI 1640 medium supplemented with 100-units/mL penicillin–streptomycin and 20% fetal bovine serum (heat-inactivated; Invitrogen).

### **Phosphoramidites**

All of the DNA reagents needed for DNA synthesis were purchased from Glen Research or ChemGenes. All the DNA oligo sequences were chemically synthesized with fluorescein-dT at the 3' end using standard solid phase phosphoramidite chemistry on an ABI394 DNA (Biolitics) synthesizer using a 0.2  $\mu$ mole scale. The completed DNA sequences were deprotected in ammonium hydroxide and purified using HPLC (Waters) equipped with a C-18 reversed phase column (Waters). All in vitro experiments were performed using a binding buffer composed of DPBS and 4.5 g/L glucose (Sigma-Aldrich) and 5 mM MgCl<sub>2</sub>, 100 mg/L, tRNA (Sigma-Aldrich), 100 mg/L BSA (Sigma-Aldrich). The wash buffer was composed of DPBS with 5 mM MgCl<sub>2</sub> and 4.5 g/L glucose (Sigma-Aldrich).

### **Cell binding assays**

#### **Determination of aptamer affinity:**

Aptamers were folded for 5 min/100 $\mu$ L at 95.0°C then snap chilled on ice for 45 minutes. The affinities of the aptamer sequences were evaluated by incubating  $1.0 \times 10^5$  HL60 cells with concentrations of 250nM, 125nM, 25nM, 5nM, 1nM and 0nM of fluorescein-dT labeled aptamer in 200 $\mu$ L of binding buffer or random control on ice for 45 min. The cells were then washed once with 2.0mL of wash buffer at 4°C and reconstituted in 250  $\mu$ L of wash buffer. The binding of the constructs was analyzed using FACS Calibur flow cytometer (Cytek.) by counting 10000 events for each concentration. The equilibrium disassociation constant (Kd) of the aptamer-cell interaction was obtained by plotting the difference in median fluorescence intensity against concentration. Specific binding was calculated with the equation  $Y = \frac{B_{max} \cdot X}{Kd + X}$ , using GraphPad Prism 5 (La Jolla, CA, USA).

#### **37°C Binding**

Aptamers were folded for 5 min/100 $\mu$ L at 95.0°C then snap chilled on ice for 45 minutes. The binding of the aptamer sequences were evaluated by incubating  $1.0 \times 10^5$  HL60 cells with concentrations of 1 $\mu$ M of fluorescein-dT labeled aptamer or random control in 200 $\mu$ L of binding buffer at 37°C for 45min. The cells were then washed once with 2.0mL of 37°C wash buffer at and reconstituted in 250  $\mu$ L of 37°C wash buffer. The binding of the constructs was analyzed using FACS Calibur flow cytometer (Cytek.) by counting 10000 events for each concentration.

#### **Specificity assays**

Aptamers were folded for 5 min/100 $\mu$ L at 95.0°C then snap chilled on ice for 45 minutes. The specificity of the aptamer sequences were evaluated by incubating  $1.0 \times 10^5$  HL60 cells, Jurkat (T cells) and Daudi (B cells) with concentrations of 500nM of fluorescein-dT labeled aptamer separately in 200 $\mu$ L of binding buffer on ice for 45min. The cells were then washed once with 2.0mL of wash buffer and reconstituted in 250  $\mu$ L of wash buffer. The binding of the constructs was analyzed using FACS Calibur flow cytometer (Cytek) by counting 10000 events for each concentration. The specific binding was determined using the equation  $\frac{\text{aptamer} - \text{Random control}}{\text{aptamer}} * 100$  and quantified using Graph Pad Prism 5 (La Jolla, CA, USA).

#### **Nuclease stability**

Aliquots of 50 pmol of fluorescently labelled modified aptamers were incubated at 37°C in a final volume of 20 $\mu$ L in human serum and in 20 $\mu$ L of phosphate-buffered saline (PBS) buffer for 0, 0.5 1, 2, 3, 6, and 24 hours. At the end of each time point, the reactions were terminated by adding 20 $\mu$ L 2xTBE Urea loading buffer (Invitrogen-Novex®) 20x SYBR® Green (Lonza) and stored in -80°C. Full-length and digested DNA were analyzed by 10%-TBE urea polyacrylamide gel electrophoresis using Bio-Rad Gel Dock EZ Imager and Image Lab Software version 5.2.1.

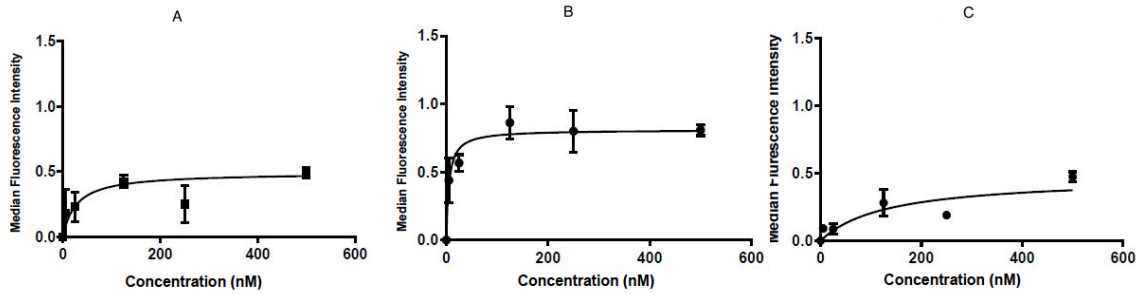

**Figure S1. Analysis of affinities of truncated analogues of aptamer KH1C12 at 4°C.**

The affinity curve for the analogue KH1C12.O1 (A), KH1C12.O2 (B), KH1C12.O3 (C). The affinities of the aptamer sequences were evaluated by incubating  $1.0 \times 10^5$  HL60 cells with concentrations of 500nM, 250nM, 125nM, 25nM, 5nM, and 1nM of Fluorescein-dT labeled aptamer in 200 $\mu$ L of binding buffer on ice for 45 min. The cells were then washed once with 2.0mL of wash buffer at 4°C and reconstituted in 250  $\mu$ L of wash buffer. The binding of the constructs was analyzed using FACS Calibur flow cytometer (Cytek,) by counting 10000 events for each concentration. The equilibrium disassociation constant (Kd) of the aptamer-cell interaction was obtained by plotting the difference in median fluorescence intensity against concentration. Specific binding was calculated with the equation  $Y = \frac{B_{max} \cdot X}{Kd + X}$ , using GraphPad Prism 5 (La Jolla, CA, USA).

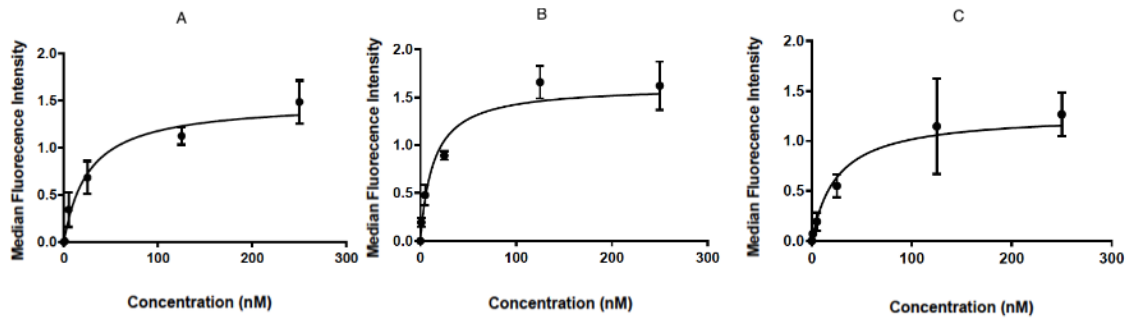

**Figure S2. Analysis of affinities of aptamer analogues modified with 2'-O-methyl RNA bases at 4°C.**

The affinity curve for the analogue O2.G1 (A), O2.G2 (B), O2.G3 (C). The affinities of the aptamer sequences were evaluated by incubating  $1.0 \times 10^5$  HL60 cells with concentrations of 500nM, 250nM, 125nM, 25nM, 5nM, and 1nM of Fluorescein-dT labeled aptamer in 200 $\mu$ L of binding buffer on ice for 45 min. The cells were then washed once with 2.0mL of wash buffer at 4°C and reconstituted in 250  $\mu$ L of wash buffer. The binding of the constructs was analyzed using FACS Calibur flow cytometer (Cytek,) by counting 10000 events for each concentration. The equilibrium disassociation constant (Kd) of the aptamer-cell interaction was obtained by plotting the difference in median fluorescence intensity against concentration. Specific binding was calculated with the equation  $Y = \frac{B_{max} \cdot X}{Kd + X}$ , using GraphPad Prism 5 (La Jolla, CA, USA).

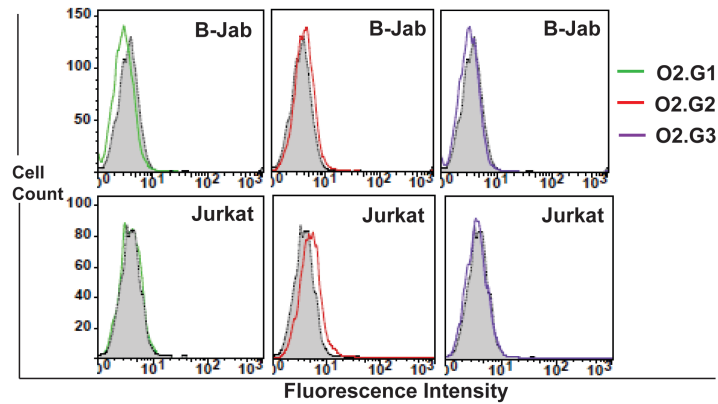

**Figure S3. Specificity of aptamer analogues modified with 2'-O-methyl RNA bases at 37°C**

Analysis of specificity of 2'-O-methyl RNA-substituted O2.G analogues against three different cell lines. The specificity of the aptamer sequences was evaluated by incubating  $1.0 \times 10^5$ , Jurkat (T cells) and B-Jab (B cells) with concentrations of  $1\mu\text{M}$  of Fluorescein-dT-labeled aptamer separately in  $200\mu\text{L}$  of  $37^\circ\text{C}$  binding buffer for 45min. Cells were then washed once with  $2.0\text{mL}$  of  $37^\circ\text{C}$  wash buffer and reconstituted in  $250\mu\text{L}$  of  $37^\circ\text{C}$  wash buffer.
